# Supplementary material
Source: Research Square preprint supplement (doi:10.21203/rs.3.rs-9235117/v1)
Supplement: Supplementary file 1 [file f25469679112d1b6551f80a8.docx]

# Supplementary information

## 1 Complete inventory of the China battery value-chain network

**Table 1** Abbreviation crosswalk for the 108 nodes

| Node_Name | Node_Abbr |
| --- | --- |
| Battery Manufacturing | BM |
| Electric Vehicle Manufacturing | EVM |
| Consumer Electric Appliance Manufacturing | CEAM |
| Generator and Motor Manufacturing | GMM |
| Blast Furnace Steelmaking with Rolling | BFSR |
| Power Control Equipment Manufacturing | PCEM |
| Petrochemical Products Manufacturing | PPM2 |
| Can Making and Sheet Metal Work | CMSMW |
| Electronic Computer Manufacturing | ECMM |
| Electronic Components Manufacturing Except IC | ECMEI |
| Machine Tools Manufacturing | MTM |
| Industrial Electric Equipment Wholesale | IEEW |
| Internal Combustion Engine Electrical Equipment Manufacturing | ICEEM |
| Other Inorganic Chemical Products Manufacturing | OICP |
| Lead Recycled Alloy Manufacturing | LRAM |
| Cargo Handling Equipment Manufacturing | CHEM |
| Other Chemical Industry Products Manufacturing | OCIPM |
| Metal Stamping Products Manufacturing | MSPM |
| Primary Copper Smelting and Refining | PCSR |
| Other Metal Surface Treatment | OMST |
| Electric Lighting Equipment Manufacturing | ELEM |
| General Merchandise Wholesale | GMW |
| General-Purpose Internal Combustion Engine Manufacturing | GICEM |
| Other Nonferrous Recycled Alloy Manufacturing | ONRAM |
| Other Organic Chemical Products Manufacturing | OOCP2 |
| Precision Machinery and Equipment Wholesale | PMEW |
| Cyclic Intermediate Products Manufacturing | CIPM3 |
| Other Communications Equipment Manufacturing | OCEM |
| Rivets and Screws Manufacturing | RSM |
| Refrigeration and Air Conditioning Equipment Manufacturing | RACEM |
| Electric Audio Equipment Manufacturing | EAEM |
| Wired Communications Equipment Manufacturing | WCEM |
| Industrial Resin Products Manufacturing | IRPM |
| Other Carbon Products Manufacturing | OCPM |
| Office Machinery and Equipment Manufacturing | OMEM2 |
| Mobile Communications | MC |
| Other Electric Machinery Manufacturing | OEMM |
| Other Electronic Components Manufacturing | OECM |
| Nonferrous Metals Wholesale | NMW |
| Other Chemical Products Wholesale | OCPW |
| Steel and Processed Steel Products Wholesale | SPSW |
| Camera and Accessories Manufacturing | CAM |
| Ferroalloy Manufacturing | FAM |
| Electric Measuring Instruments Manufacturing | EMIM |
| Gelatin and Adhesive Manufacturing | GAM |
| Felt and Nonwoven Fabric Manufacturing | FNF |
| Electrical Ceramics Manufacturing | ECerM |
| Chemical Machinery and Equipment Manufacturing | CMEM |
| Elevator Manufacturing | EM |
| Mineral and Stone Crushing and Processing | MSCP |
| Coke Manufacturing | CkM |
| Metal Products Coating | MPC |
| Electric Power Company | EPC |
| Other Industrial Machinery and Equipment Manufacturing | OIMEM |
| Wrought Copper Products Manufacturing | WCPM |
| Powder Metallurgy Products Manufacturing | PMPM |
| Metal Working Machinery Manufacturing | MWMM |
| Other Primary Nonferrous Metal Smelting | OPNMS |
| Medical Equipment Manufacturing | MEM |
| Connection and Switching Components Manufacturing | CSCM |
| Printed Circuit Manufacturing | PCM |
| Other Nonferrous Metal Manufacturing | ONMM |
| Transport Machinery and Equipment Wholesale | TMEW |
| Automobile Body Manufacturing | ABM |
| Marine Engine Manufacturing | MEM2 |
| Industrial Transport Vehicle Manufacturing | ITVM |
| Integrated Circuit Manufacturing | ICM |
| Nonferrous Metal Scrap Wholesale | NMSW |
| Synthetic Resin Plates, Pipes, etc. Wholesale | SRPPW |
| Machinery and Parts Manufacturing and Repair | MPMR |
| Home Appliance Retail | HAR |
| Industrial Robot Manufacturing | IRM |
| Molds and Parts Manufacturing | MPM2 |
| Other General Merchandise Wholesale | OGMW |
| Medical Electronic Equipment Manufacturing | MEEM |
| Industrial Resin Products Processing | IRPP |
| Industrial Instruments Manufacturing | IIM |
| Metal Processing Machinery Manufacturing | MPMM |
| Other Measuring Instruments Manufacturing | OMIM |
| Precision Measuring Instruments Manufacturing | PMIM |
| Other Hardware Products Manufacturing | OHPM |
| Industrial Furnace Manufacturing | IFM |
| Household Electric Appliance Wholesale | HEAW |
| Flat Glass Processing | FGP |
| Volume Meters Manufacturing | VMM |
| Resin Processing Machinery Manufacturing | RPMM |
| Metal Processing Machinery Parts Manufacturing | MPMPM2 |
| Resin Film Processing | RFP |
| Automobile (New Car) Retail | ANR |
| Steel Ship Building and Repair | SSBR |
| Synthetic Resin Molding Materials Wholesale | SRMMW |
| Resin Plate Products Processing | RPPP |
| Compressed and Liquid Gas Wholesale | CLGW |
| Other Resin Products Manufacturing | ORPM |
| Resin Film Manufacturing | RFM |
| Steel Cutting and Flame Cutting | SCFC |
| Used Automobile Retail | UAR |
| Pressure and Flow Meters Manufacturing | PFMM |
| Information Appliance Retail | IAR |
| Medical Machinery and Equipment Wholesale | MMEW |
| Analytical Instruments Manufacturing | AIM |
| Rocket Manufacturing | RM |
| Construction and Mining Machinery Wholesale | CMMW |
| Casting Equipment Manufacturing | CEM |
| Scientific Instruments Manufacturing | SIM |
| Automobile Wholesale | AW |
| Automobile Parts Retail | APR |
| Used Automobile Wholesale | UAW |

## 2 Catalogue of resource-circulation policy applications

**Table 2** value-flow pathway table

| From_Node | To_Node | Recycling_Edge_Type |
| --- | --- | --- |
| Battery Manufacturing | Industrial Electric Equipment Wholesale | Second-life |
| Electric Vehicle Manufacturing | Industrial Electric Equipment Wholesale | Second-life |
| Automobile Body Manufacturing | Industrial Electric Equipment Wholesale | Second-life |
| Industrial Transport Vehicle Manufacturing | Industrial Electric Equipment Wholesale | Second-life |
| Automobile (New Car) Retail | Industrial Electric Equipment Wholesale | Second-life |
| Used Automobile Retail | Industrial Electric Equipment Wholesale | Second-life |
| Automobile Wholesale | Industrial Electric Equipment Wholesale | Second-life |
| Automobile Parts Retail | Industrial Electric Equipment Wholesale | Second-life |
| Used Automobile Wholesale | Industrial Electric Equipment Wholesale | Second-life |
| Battery Manufacturing | Power Control Equipment Manufacturing | Second-life |
| Electric Vehicle Manufacturing | Power Control Equipment Manufacturing | Second-life |
| Automobile Body Manufacturing | Power Control Equipment Manufacturing | Second-life |
| Industrial Transport Vehicle Manufacturing | Power Control Equipment Manufacturing | Second-life |
| Automobile (New Car) Retail | Power Control Equipment Manufacturing | Second-life |
| Used Automobile Retail | Power Control Equipment Manufacturing | Second-life |
| Automobile Wholesale | Power Control Equipment Manufacturing | Second-life |
| Automobile Parts Retail | Power Control Equipment Manufacturing | Second-life |
| Used Automobile Wholesale | Power Control Equipment Manufacturing | Second-life |
| Lead Recycled Alloy Manufacturing | Battery Manufacturing | Secondary material |
| Other Nonferrous Recycled Alloy Manufacturing | Battery Manufacturing | Secondary material |
| Nonferrous Metal Scrap Wholesale | Battery Manufacturing | Secondary material |
| Lead Recycled Alloy Manufacturing | Electric Vehicle Manufacturing | Secondary material |
| Other Nonferrous Recycled Alloy Manufacturing | Electric Vehicle Manufacturing | Secondary material |
| Nonferrous Metal Scrap Wholesale | Electric Vehicle Manufacturing | Secondary material |
| Power Control Equipment Manufacturing | Lead Recycled Alloy Manufacturing | Material recycling |
| Industrial Electric Equipment Wholesale | Lead Recycled Alloy Manufacturing | Material recycling |
| Internal Combustion Engine Electrical Equipment Manufacturing | Lead Recycled Alloy Manufacturing | Material recycling |
| Electrical Ceramics Manufacturing | Lead Recycled Alloy Manufacturing | Material recycling |
| Electric Power Company | Lead Recycled Alloy Manufacturing | Material recycling |
| Power Control Equipment Manufacturing | Nonferrous Metal Scrap Wholesale | Material recycling |
| Industrial Electric Equipment Wholesale | Nonferrous Metal Scrap Wholesale | Material recycling |
| Internal Combustion Engine Electrical  Equipment Manufacturing | Nonferrous Metal Scrap Wholesale | Material recycling |
| Electrical Ceramics Manufacturing | Nonferrous Metal Scrap Wholesale | Material recycling |
| Electric Power Company | Nonferrous Metal Scrap Wholesale | Material recycling |
| Battery Manufacturing | Internal Combustion Engine Electrical  Equipment Manufacturing | Second-life |
| Electric Vehicle Manufacturing | Internal Combustion Engine Electrical  Equipment Manufacturing | Second-life |
| Automobile Body Manufacturing | Internal Combustion Engine Electrical  Equipment Manufacturing | Second-life |
| Industrial Transport Vehicle Manufacturing | Internal Combustion Engine Electrical  Equipment Manufacturing | Second-life |
| Automobile (New Car) Retail | Internal Combustion Engine Electrical  Equipment Manufacturing | Second-life |
| Used Automobile Retail | Internal Combustion Engine Electrical  Equipment Manufacturing | Second-life |
| Automobile Wholesale | Internal Combustion Engine Electrical  Equipment Manufacturing | Second-life |
| Automobile Parts Retail | Internal Combustion Engine Electrical  Equipment Manufacturing | Second-life |
| Used Automobile Wholesale | Internal Combustion Engine Electrical  Equipment Manufacturing | Second-life |
| Power Control Equipment Manufacturing | Other Nonferrous Recycled Alloy Manufacturing | Material recycling |
| Industrial Electric Equipment Wholesale | Other Nonferrous Recycled Alloy Manufacturing | Material recycling |
| Internal Combustion Engine Electrical  Equipment Manufacturing | Other Nonferrous Recycled Alloy Manufacturing | Material recycling |
| Electrical Ceramics Manufacturing | Other Nonferrous Recycled Alloy Manufacturing | Material recycling |
| Electric Power Company | Other Nonferrous Recycled Alloy Manufacturing | Material recycling |
| Lead Recycled Alloy Manufacturing | Automobile (New Car) Retail | Secondary material |
| Lead Recycled Alloy Manufacturing | Used Automobile Retail | Secondary material |
| Other Nonferrous Recycled Alloy Manufacturing | Automobile (New Car) Retail | Secondary material |
| Other Nonferrous Recycled Alloy Manufacturing | Used Automobile Retail | Secondary material |
| Nonferrous Metal Scrap Wholesale | Automobile (New Car) Retail | Secondary material |
| Nonferrous Metal Scrap Wholesale | Used Automobile Retail | Secondary material |
| Battery Manufacturing | Electrical Ceramics Manufacturing | Second-life |
| Electric Vehicle Manufacturing | Electrical Ceramics Manufacturing | Second-life |
| Automobile Body Manufacturing | Electrical Ceramics Manufacturing | Second-life |
| Industrial Transport Vehicle Manufacturing | Electrical Ceramics Manufacturing | Second-life |
| Automobile (New Car) Retail | Electrical Ceramics Manufacturing | Second-life |
| Used Automobile Retail | Electrical Ceramics Manufacturing | Second-life |
| Automobile Wholesale | Electrical Ceramics Manufacturing | Second-life |
| Automobile Parts Retail | Electrical Ceramics Manufacturing | Second-life |
| Used Automobile Wholesale | Electrical Ceramics Manufacturing | Second-life |
| Lead Recycled Alloy Manufacturing | Automobile Body Manufacturing | Secondary material |
| Other Nonferrous Recycled Alloy Manufacturing | Automobile Body Manufacturing | Secondary material |
| Nonferrous Metal Scrap Wholesale | Automobile Body Manufacturing | Secondary material |
| Lead Recycled Alloy Manufacturing | Industrial Transport Vehicle Manufacturing | Secondary material |
| Other Nonferrous Recycled Alloy Manufacturing | Industrial Transport Vehicle Manufacturing | Secondary material |
| Nonferrous Metal Scrap Wholesale | Industrial Transport Vehicle Manufacturing | Secondary material |
| Battery Manufacturing | Electric Power Company | Second-life |
| Electric Vehicle Manufacturing | Electric Power Company | Second-life |
| Automobile Body Manufacturing | Electric Power Company | Second-life |
| Industrial Transport Vehicle Manufacturing | Electric Power Company | Second-life |
| Automobile (New Car) Retail | Electric Power Company | Second-life |
| Used Automobile Retail | Electric Power Company | Second-life |
| Automobile Wholesale | Electric Power Company | Second-life |
| Automobile Parts Retail | Electric Power Company | Second-life |
| Used Automobile Wholesale | Electric Power Company | Second-life |
| Lead Recycled Alloy Manufacturing | Automobile Wholesale | Secondary material |
| Lead Recycled Alloy Manufacturing | Automobile Parts Retail | Secondary material |
| Lead Recycled Alloy Manufacturing | Used Automobile Wholesale | Secondary material |
| Other Nonferrous Recycled Alloy Manufacturing | Automobile Wholesale | Secondary material |
| Other Nonferrous Recycled Alloy Manufacturing | Automobile Parts Retail | Secondary material |
| Other Nonferrous Recycled Alloy Manufacturing | Used Automobile Wholesale | Secondary material |
| Nonferrous Metal Scrap Wholesale | Automobile Wholesale | Secondary material |
| Nonferrous Metal Scrap Wholesale | Automobile Parts Retail | Secondary material |
| Nonferrous Metal Scrap Wholesale | Used Automobile Wholesale | Secondary material |

## 3 China 2015–2035 BED scenario projections


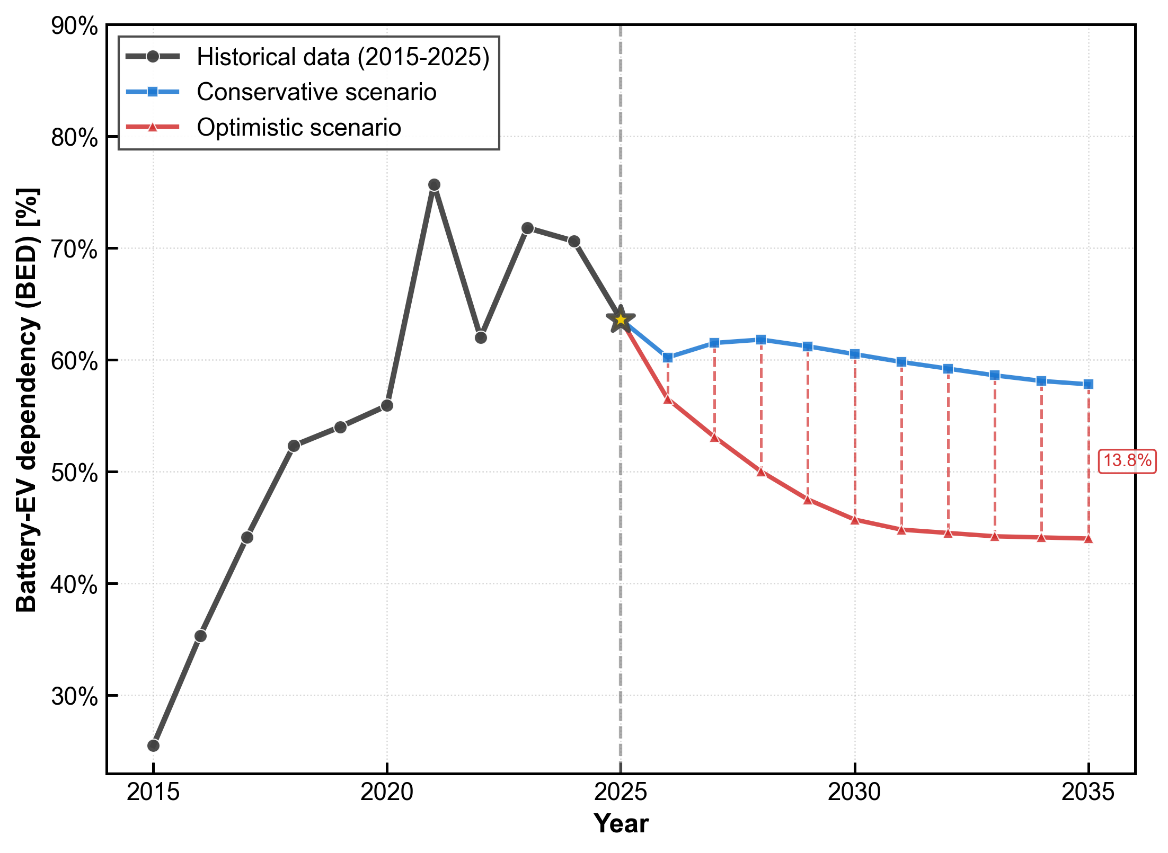


**Figure 1** year–BED mapping figure

This figure reports the share of power-battery orders allocated to China’s electric-vehicle (EV) market over 2015–2035, based on authoritative statistics and forecasts from Gaogong Industrial Research Institute (GGII) and EVTank. Historical observations for 2015–2025 are compiled from the annual industry reports and white papers released by these institutions, ensuring traceability and internal consistency. From 2026 onward, we provide two scenario projections. The optimistic scenario follows the published outlooks of GGII, EVTank and BloombergNEF (BNEF), assuming rapid growth in stationary storage demand that progressively diverts battery orders away from EV applications. The conservative scenario is derived from a hybrid ensemble model (exponential smoothing, ES; autoregressive integrated moving average, ARIMA; and grey model, GM(1,1)) fitted to historical series, incorporating nonlinear expansion drivers within the EV domain (for example, accelerating uptake of new-energy commercial vehicles and wider deployment of battery-swapping systems) and remaining aligned with long-term development plans issued by the China Association of Automobile Manufacturers (CAAM) and the Ministry of Industry and Information Technology (MIIT). All figures are reported on a lithium-ion-only basis (excluding lead–acid, nickel–metal hydride and sodium-ion batteries). Under the production (GWh) accounting standard, lithium-ion batteries dominate total output (>97.5%), and are therefore used as a robust proxy for battery-manufacturing production, ensuring that BED is consistent with prevailing industry definitions and official statistical conventions. Projections are cross-validated against policy documents and sectoral trends; the conservative scenario achieves a fitting error within ±3.2%.

## 4 Parameter calibration and sensitivity analysis

To ground the demand-shock design in clear empirical evidence, we distinguish between contractions that have already occurred in real markets and the larger shocks introduced for stress testing. A decline of ~40% is used to represent short-run, comparatively abrupt yet empirically observable downturns in EV demand. For example, Germany’s battery-electric vehicle registrations in December 2024 fell by ~38.6% year on year following adjustments in policy support and broader market conditions, illustrating how major markets can experience rapid demand retrenchment under institutional change1. Comparable dynamics have also been documented in China. Event-study evidence shows that abrupt tightening of new-energy vehicle subsidy schemes can trigger immediate and significant market responses, accompanied by pronounced short-term sales declines2. Complementary work on demand dynamics further indicates that consumers shift the timing of vehicle purchases in response to policy changes; such intertemporal substitution amplifies short-run volatility around policy turning points3.By contrast, the 60% and 80% demand shocks specified here are not mapped to any single historical episode. Rather, they are constructed as stress-test scenarios to evaluate how a battery value chain that is highly dependent on EV demand performs under more adverse—yet plausibly realizable—conditions. Assessments by international energy institutions similarly emphasize that EV demand is highly sensitive to policy frameworks and expectations, implying a non-trivial risk of sharp downside adjustments when policy shifts interact with external disturbances4. This tiered shock design therefore anchors the analysis in observed market experience while enabling a systematic characterization of the lower bound of value-chain resilience under extreme conditions.

To assess the extent to which our conclusions depend on key modelling choices, we conducted a systematic sensitivity analysis focusing on the most consequential parameters governing cascading failure and recovery. During the cascade phase, node failure is described by a profit-loss–driven logistic function, consistent with probabilistic cascade formulations that parameterize nonlinear failure responses with threshold- and steepness-controlled sigmoid transitions5. The default bankruptcy threshold is set to 0.50, implying that failure risk rises sharply once profit loss exceeds 50%, and the steepness parameter is set to 10.0 to control the abruptness of the transition from low to high failure probability6,7. To preclude pathological behavior under extreme shocks, cascade propagation is capped at 15 iterations per time step, consistent with iterative cascade simulation frameworks in which failures are propagated until no additional failures occur (or an iteration cap is reached)8,9. In the recovery phase, restoration is not uniform or random, but is determined jointly by a multidimensional priority score and a probabilistic weighting scheme, consistent with sequential recovery strategies under resource constraints in complex networks10.The recovery-priority score uses a baseline term of 0.5, augmented by upstream supply restoration (weight 0.35), degree-structure features (0.25 when out-degree exceeds in-degree; 0.10 when out-degree equals in-degree and both are non-zero), a semantic weight for material-critical nodes (0.20), downstream demand restoration (0.15), and a normalized node-weight term (0.10). At each recovery step, the recovery probability is determined by a baseline probability (p_recover) (default 0.05) combined with priority, supply, demand and time components weighted by 0.45, 0.25, 0.20 and 0.10, respectively. Recovery proceeds in fixed increments (recovery_increment =0.25)) over 45 steps, with additive stochastic noise of 0.10; the recovery phase terminates once system performance reaches 90% of the initial level (recovery_threshold =0.9\times ES_0)).

Perturbing these parameters one at a time shows that the statistical ranking of system resilience across BED levels and shock scenarios remains highly stable: we observe no ordering reversals induced by changes in the bankruptcy threshold, failure steepness or recovery rate. Parameter variation primarily affects the magnitude and fine-scale shape of the resilience trajectories, rather than the relative resilience ordering between systems.

## 5 Robustness checks for the controlled rewiring algorithm.

To isolate the effect of battery–electric vehicle dependency (BED) on system resilience, we further verified the stability of network structure and weight distributions throughout the BED-adjustment procedure. BED is defined as the share of the battery-sector outflow directed to the EV sector—that is, the weight of the battery→EV edge divided by the sum of weights over all outgoing edges from the battery node. Variation in BED is implemented via controlled weight rewiring: while keeping the node set and edge set strictly unchanged, we set the battery→EV edge weight to the product of the target BED and the battery node’s total outgoing weight, and proportionally rescale all remaining outgoing edges from the battery node to conserve its total outflow. For high-BED cases (approaching 1), we introduce a safeguard to prevent non-EV outgoing weights from being compressed to zero.

Robustness checks confirm that across the full BED sweep, the number of nodes and edges, as well as the in-degree and out-degree distributions, remain exactly invariant, indicating that the global topology is unchanged. Weight rewiring also satisfies strict conservation constraints: the total edge-weight mass of the full network, and the total incoming and outgoing weights of the battery node and all other nodes, are preserved before and after rewiring. Weight adjustments are confined to the outgoing-edge set of the battery node, without inducing systematic weight drift or distributional distortion elsewhere in the network. This topology-preserving logic is consistent with established structure-preserving rewiring approaches used to isolate effects while holding network topology fixed11, and with constrained randomization methods for weighted networks that preserve node-strength constraints12. Therefore, the resilience differences observed across BED levels cannot be attributed to artefacts of topological alteration or weight-structure deformation, but should be interpreted as endogenous system responses to changes in the strength of structural dependence between the battery and EV sectors, ensuring structural comparability and interpretability of the BED-scan results.

## References

1. European Automobile Manufacturers’ Association. New car registrations: EU (December 2024) (ACEA, 2025).
2. Liu, C., Liu, Y., Zhang, D. & Xie, C. The capital market responses to new energy vehicle (NEV) subsidies: An event study on China. Energy Econ. 105, 105677 (2022).
3. Hu, Y., Yin, H. & Zhao, L. Subsidy phase-out and consumer demand dynamics: Evidence from the battery electric vehicle market in China. Rev. Econ. Stat. 107, 458–475 (2025).
4. International Energy Agency. Global EV Outlook 2024: Moving towards increased affordability (IEA, 2024).
5. Zhang, Y., Wang, S. & Zhao, W. A model for cascading failures with the probability of failure described as a logistic function. Sci. Rep. 12, 989 (2022).
6. Scheffer, M. et al. Early-warning signals for critical transitions. Nature 461, 53–59 (2009).
7. Gao, J., Barzel, B. & Barabási, A.-L. Universal resilience patterns in complex networks. Nature 530, 307–312 (2016).
8. Motter, A. E. & Lai, Y.-C. Cascade-based attacks on complex networks. Phys. Rev. E 66, 065102(R) (2002).
9. Buldyrev, S. V. et al. Catastrophic cascade of failures in interdependent networks. Nature 464, 1025–1028 (2010).
10. Song, X., Zhao, P., Yin, R., Zu, Y. & Zhang, Y. Cascading failure model and resilience-based sequential recovery strategy for complex networks. Reliab. Eng. Syst. Saf. 248, 110488 (2024).
11. Maslov, S. & Sneppen, K. Specificity and stability in topology of protein networks. Science 296, 910–913 (2002).
12. Ansmann, G. & Lehnertz, K. Constrained randomization of weighted networks. Phys. Rev. E 84, 026103 (2011).
